## Manuscript Withdrawal File

### Title:

Intravaginal artesunate pessaries for treatment of cervical intraepithelial neoplasia 2/3 among HIV-positive and HIV-negative women in Kenya: Study protocol for a pilot trial

### Authors:

Chemtai Mungo, MD, MPH<sup>1,2</sup>; Katherine Sorgi,<sup>1</sup> Caroline Hoch, BS<sup>3</sup>; Jennifer Tang, MD, MSCR<sup>1</sup>; Lisa Rahangdale, MD, MPH<sup>1,2</sup> Jackton Omoto, MBChB<sup>4</sup>

### Affiliations:

1. Department of Obstetrics and Gynecology, University of North Carolina Chapel Hill, 321 S Columbia St, Chapel Hill, North Carolina, 27599, USA.
2. Lineberger Comprehensive Cancer Center, University of North Carolina-Chapel Hill, 450 West Dr, Chapel Hill, North Carolina, 27599, USA
3. UNC Gillings School of Global Public Health, 170 Rosenau Hall, Campus Box 7400, 135 Dauer Drive, Chapel Hill, North Carolina, 27599, USA
4. Department of Obstetrics and Gynecology, Maseno University School of Medicine, P.O. Box 3408, Kisumu, Kenya

### Withdrawal Statement:

The authors have withdrawn this manuscript because the article was posted prior to consultation from all relevant collaborators. If you have any questions, please contact the corresponding author.
